# Supplementary material for: Hepatoprotective Effect of Yiqijianpi Formula (YQJPF) on Liver Failure Through Modulation of Hypoxic and Apoptosis Pathways
Source: Research Square preprint supplement (doi:10.21203/rs.3.rs-122878/v1), 2020-12-10
Supplement: Supplementary file 1 [file 8d5c47ae25e94e06b1067943.xlsx]

## Sheet: Table S20
Table S20 Analysis of Enrichment of the KEGG/GO Pathways
Term	Count	Ratio	pvalue	LogP
KEGG PATHWAYS
hsa05161 Hepatitis B	15	10.4167	5.06802e-14	-13.2952
hsa04151 PI3K-Akt signaling pathway	18	5.26316	1.76226e-11	-10.7539
hsa00260 Glycine, serine and threonine metabolism	8	20	2.1626e-10	-9.66502
hsa04115 p53 signaling pathway	9	13.0435	8.63478e-10	-9.06375
hsa04510 Focal adhesion	13	6.53266	9.36109e-10	-9.02867
hsa00982 Drug metabolism - cytochrome P450	9	12.8571	9.85246e-10	-9.00646
hsa04068 FoxO signaling pathway	11	8.33333	1.47305e-09	-8.83178
hsa04066 HIF-1 signaling pathway	10	9.90099	1.54787e-09	-8.81027
hsa05418 Fluid shear stress and atherosclerosis	11	7.74648	3.20339e-09	-8.49439
hsa04152 AMPK signaling pathway	10	8.33333	8.38814e-09	-8.07633
hsa04110 Cell cycle	10	8.06452	1.1526e-08	-7.93832
hsa05160 Hepatitis C	10	7.63359	1.9573e-08	-7.70834
hsa04210 Apoptosis	10	7.24638	3.22327e-08	-7.4917
hsa00980 Metabolism of xenobiotics by cytochrome P450	8	10.8108	3.49599e-08	-7.45643
hsa04062 Chemokine signaling pathway	11	6.04396	4.26888e-08	-7.36969
hsa00250 Alanine, aspartate and glutamate metabolism	6	17.1429	1.12936e-07	-6.94717
hsa04611 Platelet activation	9	7.31707	1.47423e-07	-6.83143
hsa04380 Osteoclast differentiation	9	6.92308	2.37016e-07	-6.62522
hsa04064 NF-kappa B signaling pathway	8	8.42105	2.50373e-07	-6.60141
hsa00830 Retinol metabolism	7	10.7692	2.6471e-07	-6.57723
GO Molecular Functions
GO:0016491:oxidoreductase activity	33	20.25	5.12861e-18	-17.29
GO:0004879:nuclear receptor activity	10	6.13	5.62341e-13	-12.25
GO:0019900:kinase binding	23	14.11	9.54993e-10	-9.02
GO:0004672:protein kinase activity	20	12.27	4.67735e-09	-8.33
GO:0004953:icosanoid receptor activity	5	3.07	3.54813e-08	-7.45
GO:0042803:protein homodimerization activity	19	11.66	7.24436e-08	-7.14
GO:0016705:oxidoreductase activity, acting on paired donors, with incorporation or reduction of molecular oxyge	10	6.13	1.38038e-07	-6.86
GO:0016614:oxidoreductase activity, acting on CH-OH group of donors	9	5.52	2.51189e-07	-6.6
GO:0019904:protein domain specific binding	19	11.66	3.23594e-07	-6.49
GO:0019903:protein phosphatase binding	9	5.52	4.46684e-07	-6.35
GO:0004175:endopeptidase activity	14	8.59	1.20226e-06	-5.92
GO:1901681:sulfur compound binding	11	6.75	1.25893e-06	-5.9
GO:0031406:carboxylic acid binding	10	6.13	2.45471e-06	-5.61
GO:0002020:protease binding	8	4.91	2.88403e-06	-5.54
GO:0005496:steroid binding	7	4.29	3.54813e-06	-5.45
GO:0043394:proteoglycan binding	5	3.07	3.98107e-06	-5.4
GO:0035173:histone kinase activity	4	2.45	4.2658e-06	-5.37
GO:0009055:electron transfer activity	7	4.29	7.76247e-06	-5.11
GO:0016769:transferase activity, transferring nitrogenous groups	4	2.45	1.54882e-05	-4.81
GO:0035586:purinergic receptor activity	4	2.45	2.18776e-05	-4.66
GO Biological Processes
response to wounding	42	25.77	2.13796e-28	-27.67
response to steroid hormone	32	19.63	9.33254e-26	-25.03
organic hydroxy compound metabolic process	35	21.47	2.51189e-24	-23.6
cellular response to lipid	36	22.09	1.02329e-23	-22.99
response to acid chemical	29	17.79	1.77828e-23	-22.75
response to toxic substance	33	20.25	1.58489e-22	-21.8
response to ketone	23	14.11	4.89779e-22	-21.31
response to extracellular stimulus	32	19.63	1.99526e-21	-20.7
positive regulation of cellular component movement	33	20.25	6.60693e-21	-20.18
monocarboxylic acid metabolic process	34	20.86	7.58578e-21	-20.12
response to xenobiotic stimulus	23	14.11	2.51189e-18	-17.6
cytokine-mediated signaling pathway	33	20.25	3.0903e-17	-16.51
regulation of hormone levels	27	16.56	3.01995e-16	-15.52
reactive oxygen species metabolic process	21	12.88	4.57088e-16	-15.34
circulatory system process	27	16.56	6.45654e-16	-15.19
blood vessel development	31	19.02	9.33254e-16	-15.03
response to lipopolysaccharide	22	13.5	1.07152e-15	-14.97
gland development	24	14.72	2.88403e-15	-14.54
leukocyte migration	25	15.34	5.7544e-15	-14.24
phosphatidylinositol 3-kinase signaling	16	9.82	5.88844e-15	-14.23
GO Cellular Components
extracellular matrix	20	3.73832	5.56415e-10	-9.2546
membrane raft	16	4.89297	7.18543e-10	-9.14355
protein kinase complex	10	9.70874	1.87902e-09	-8.72607
vesicle lumen	14	4.12979	7.27932e-08	-7.13791
basal part of cell	7	12.7273	8.16048e-08	-7.08828
side of membrane	18	3.00501	1.18987e-07	-6.9245
mitochondrial matrix	13	2.75424	1.85352e-05	-4.732
plasma lipoprotein particle	4	11.1111	9.61971e-05	-4.01684
endocytic vesicle	9	3	0.000197159	-3.70518
myelin sheath	4	8.33333	0.000298553	-3.52498
endolysosome	3	15	0.000308116	-3.51129
organelle envelope lumen	5	5.61798	0.000332412	-3.47832
peroxisome	6	4.31655	0.000352599	-3.45272
nuclear envelope	11	2.31092	0.000376824	-3.42386
mitochondrial envelope	14	1.85185	0.000580163	-3.23645
cytoplasmic side of plasma membrane	6	3.92157	0.000586791	-3.23152
specific granule lumen	4	6.45161	0.00079601	-3.09908
perinuclear region of cytoplasm	13	1.78817	0.00125024	-2.90301
cell body	11	1.90972	0.00177229	-2.75147
nuclear transcription factor complex	6	2.98507	0.00237821	-2.62375
