# Supplementary material for: Hepatoprotective Effect of Yiqijianpi Formula (YQJPF) on Liver Failure Through Modulation of Hypoxic and Apoptosis Pathways
Source: Research Square preprint supplement (doi:10.21203/rs.3.rs-122878/v1), 2020-12-10
Supplement: Supplementary file 2 [file b6d5fa1bf54cb3687a04fadb.docx]

Supplementary materials 2

Table S12-13 Targets and compounds with the top 10 degree values

|  | Table S12 TOP 10 degree compounds | | |
| --- | --- | --- | --- |
| Mol | compound Name | source | dgree |
| MOL000098 | quercetin | Astragalus membranaceus, Fructus Ligustri Lucidi | 284 |
| MOL000358 | beta-sitosterol | radix pseudostellariae, Angelica sinensis, Fructus Ligustri Lucidi, Scutellaria baicalensis | 140 |
| MOL012744 | resveratrol | Astragalus membranaceus | 130 |
| MOL000422 | kaempferol | Astragalus membranaceus, Fructus Ligustri Lucidi | 114 |
| MOL000006 | luteolin | radix pseudostellariae、Fructus Ligustri Lucidi | 106 |
| MOL005195 | syringaresinol diglucoside_qt | Fructus Ligustri Lucidi | 101 |
| MOL005146 | Lucidumoside D | Fructus Ligustri Lucidi | 99 |
| MOL000289 | pachymic acid | Wolfiporia extensa | 64 |
| MOL000392 | formononetin | Astragalus membranaceus,Glycyrrhiza uralensis | 58 |
| MOL001506 | Supraene | radix pseudostellariae, Scutellaria baicalensis | 58 |

| Table S13 TOP 10 degree targets | | |
| --- | --- | --- |
| Gene | Protten name | dgree |
| PTGS2 | Prostaglandin G/H synthase 2 | 102 |
| PTGS1 | Prostaglandin G/H synthase 1 | 76 |
| NCOA2 | Nuclear receptor coactivator 2 | 55 |
| AR | Androgen receptor | 54 |
| PRSS1 | Trypsin-1 | 48 |
| ESR1 | Estrogen receptor | 47 |
| NOS2 | Nitric oxide synthase, inducible | 47 |
| SCN5A | Sodium channel protein type 5 subunit alpha | 44 |
| PPARG | Peroxisome proliferator-activated receptor gamma | 43 |
| ADRB2 | Beta-2 adrenergic receptor | 42 |
